# Supplementary material
Source: Springer Nature journal article supplement (https://www.springermedizin.de/resource/supplementary/12911_2012_543_MOESM3_ESM.pdf/9525798)
Supplement: MOESM3 [file 9525798]

**Additional file 2: Physician questionnaire**

| Items                                                                                                                                                                               | EHR implementation factor                                    |
|-------------------------------------------------------------------------------------------------------------------------------------------------------------------------------------|--------------------------------------------------------------|
| 1) The technical limitations of EHRs (for example, slow computer system speed) are a barrier to EHR implementation.                                                                 | Design and technical concerns                                |
| 2) Physicians' concerns that EHR use may compromise patient privacy are a barrier to EHR implementation.                                                                            | Privacy and security concerns (patient privacy)              |
| 3) Physicians' concerns that EHR use may compromise the confidentiality of their professional work are a barrier to EHR implementation.                                             | Privacy and security concerns (professional confidentiality) |
| 4) Uniformity of standards for EHR systems is a facilitator to EHR implementation.                                                                                                  | Quality standards                                            |
| 5) Physicians' concerns about the high start-up and ongoing maintenance costs associated with EHR implementation and use are a barrier to EHR implementation.                       | Cost issues (start-up and maintenance)                       |
| 6) Physicians' concerns of an inadequate return on investment are a barrier to EHR implementation.                                                                                  | Cost issues (return on investment)                           |
| 7) Physicians' concerns about loss of productivity during transition to EHRs are a barrier to EHR implementation.                                                                   | Productivity (loss of)                                       |
| 8) Physicians' lack of confidence in EHR vendors is a barrier to EHR implementation. For example, concerns that an EHR vendor may provide inadequate support or go out of business. | Confidence in EHR developer or vendor                        |
| 9) Physicians' concerns that EHRs may compromise physician-patient interaction are a barrier to EHR implementation.                                                                 | Patient and health professional interaction                  |
| 10) A solo or small practice size is a barrier to EHR implementation.                                                                                                               | Practice size (small)                                        |
| 11) A large practice size is a facilitator to EHR implementation.                                                                                                                   | Practice size (large)                                        |
| 12) The fee-for-service payment of Canadian physicians is a barrier to EHR implementation, as time used implementing EHRs reduces revenue generated.                                | Physician salary status and reimbursement                    |
| 13) Physicians' lack of time to acquire, implement and learn to use EHRs is a barrier to EHR implementation.                                                                        | Lack of time and workload (EHR use)                          |
| 14) Physicians' concerns that EHR implementation would take time away from their clinical tasks is a barrier to EHR implementation.                                                 | Lack of time and workload (clinical tasks)                   |
| 15) Physicians' concerns about taking on additional tasks and responsibilities that are not presently considered their responsibility are a barrier to EHR implementation.          | Change in tasks                                              |
| 16) Lack of technical support is a barrier to EHR implementation.                                                                                                                   | Human resources (IT support)                                 |
| 17) Physicians' concern that management may use EHRs as a way to control their actions is a barrier to EHR implementation.                                                          | Management (strategic plan to implement EHRs)                |
| 18) Standardization of the EHR acquisition process is a facilitator to EHR implementation.                                                                                          | Choice of the EHR system                                     |
